# Supplementary material for: Alkaline earth metal ion coordination increases the radical scavenging efficiency of kaempferol
Source: Royal Society of Chemistry journal article supplement (doi:10.1039/d0ra03249b), 2020-01-01
Supplement: d0ra03249b1.pdf [file d0ra03249b1.pdf]

*Supporting information*

**Alkaline earth metal ion coordination increases radical scavenging efficiency of kaempferol**

Ling-Ling Qian<sup>†</sup>, Yao Lu<sup>†</sup>, Yi Xu<sup>†</sup>, Zhi-Yin Yang<sup>†</sup>, Jing Yang<sup>†</sup>, Yi-Ming Zhou<sup>†</sup>, Rui-Min Han<sup>†,\*</sup>, Jian-Ping Zhang<sup>†</sup>, Leif H. Skibsted<sup>‡</sup>

<sup>†</sup>Department of Chemistry, Renmin University of China, Beijing, 100872

<sup>‡</sup>Department of Food Science, University of Copenhagen, Rolighedsvej 30, DK-1958 Frederiksberg C, Denmark

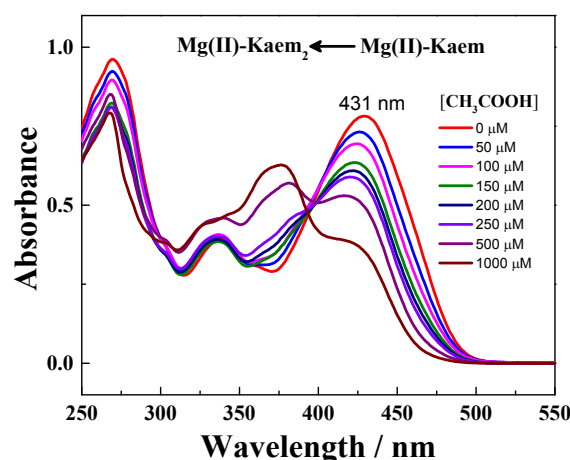

**Figure S1.** Absorption spectra of 50  $\mu\text{M}$  Kaem in the presence of 500  $\mu\text{M}$   $\text{Mg}(\text{CH}_3\text{COO})_2$  with addition of 50, 100, 150, 200, 250, 500 and 1000  $\mu\text{M}$   $\text{CH}_3\text{COOH}$ .

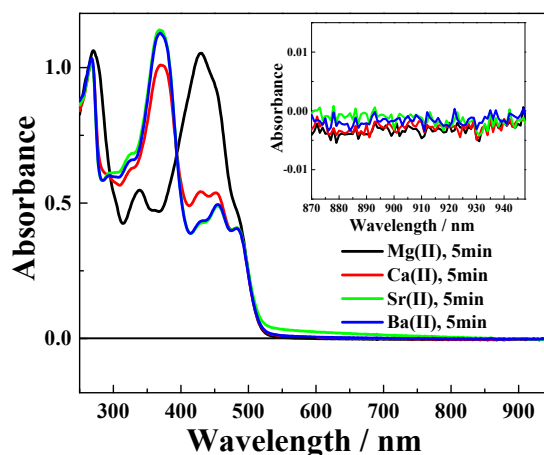

**Figure S2.** Absorption spectra of 5  $\mu\text{M}$   $\beta\text{-Car}$  with 50  $\mu\text{M}$  Kaem and 500  $\mu\text{M}$   $\text{Mg}/\text{Ca}/\text{Sr}/\text{Ba}(\text{II})$  after 532 nm laser radiation (10 Hz, 4 mJ/pulse) for 5 min. Inset: enlarged view of spectra at 870~950 nm.

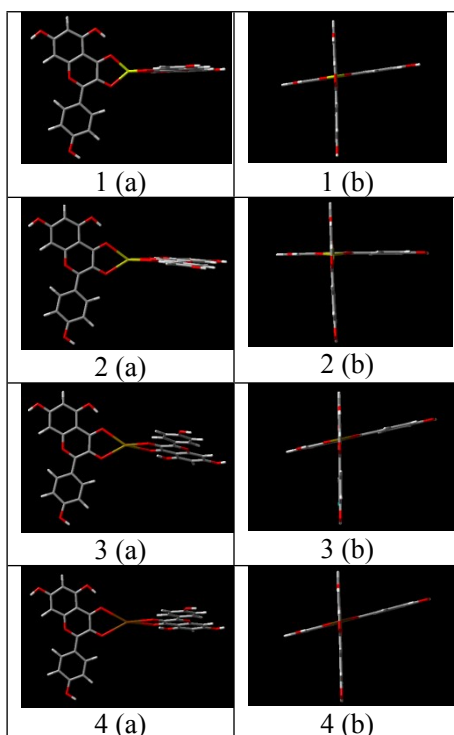

**Figure S3.** Optimized structures of (1) Mg(II)-Kaem<sub>2</sub>, (2) Ca(II)-Kaem<sub>2</sub>, (3) Sr(II)-Kaem<sub>2</sub>, (4) Ba(II)-Kaem<sub>2</sub> complexes viewed from (a) perpendicular to the plane of one Kaem ligand and parallel to the other Kaem, and from (b) parallel to the two planes of the two Kaem ligands.

**Table S1.** IR spectra peak (cm<sup>-1</sup>) for 1.0 mM Kaem/Api, and solids prepared by removing solvent from ethanol solutions of Kaem/Api and M(CH<sub>3</sub>COO)<sub>2</sub> with ratios of 1:10. M= Mg(II), Ca(II), Sr(II), Ba(II).

| Compound           | $\nu(\text{C}=\text{O})$ | $\nu(\text{C}=\text{C})$ | $\nu(\text{C}-\text{OH})$ | $\nu(\text{C}-\text{O}-\text{C})$ | $\nu(\text{M}-\text{O})$ |
|--------------------|--------------------------|--------------------------|---------------------------|-----------------------------------|--------------------------|
| <b>Kaem</b>        | 1657                     | 1613                     | 1372                      | 1243                              | -                        |
| <b>Kaem-Mg(II)</b> | 1648                     | 1602                     | 1367                      | 1226                              | 609                      |
| <b>Kaem-Ca(II)</b> | 1650                     | 1615                     | 1365                      | 1223                              | 582                      |
| <b>Kaem-Sr(II)</b> | 1653                     | 1608                     | 1367                      | 1221                              | 463                      |
| <b>Kaem-Ba(II)</b> | 1654                     | 1607                     | 1370                      | 1224                              | 644                      |
| <b>Api</b>         | 1659                     | 1605                     | 1357                      | 1243                              |                          |
| <b>Api-Mg(II)</b>  | 1640                     | 1595                     | 1357                      | 1248                              | 605                      |
| <b>Api-Ca(II)</b>  | 1659                     | 1605                     | 1377                      | 1243                              |                          |
| <b>Api-Sr(II)</b>  | 1659                     | 1605                     | 1364                      | 1243                              |                          |
| <b>Api-Ba(II)</b>  | 1659                     | 1605                     | 1367                      | 1243                              |                          |

**Table S2.** Experimental (Exp.) and calculated (Cal.) ESI mass spectra (m/z) for solids prepared by removing solvent from ethanol solutions of 1000  $\mu\text{M}$  Kaem/Api and  $\text{M}(\text{CH}_3\text{COO})_2$  with ratios of 1:0.5 and 1:1,  $\text{M}=\text{Mg}(\text{II}), \text{Ca}(\text{II}), \text{Sr}(\text{II}), \text{Ba}(\text{II})$ .

| Exp. (m/z)  | Cal. (m/z)  | Kaem:M(II) =1:0.5                                                                       | Exp. (m/z)  | Cal. (m/z)  | Kaem/Api:M(II)=1:1                                                      |
|-------------|-------------|-----------------------------------------------------------------------------------------|-------------|-------------|-------------------------------------------------------------------------|
| 595         | 595/596/597 | $\text{Mg}-(\text{Kaem}-\text{H})_2+\text{H}^+$                                         | 363/364/365 | 363/364/365 | $\text{Mg}-(\text{Kaem}-2\text{H})+\text{Na}^++\text{CH}_3\text{OH}$    |
| 613/614/615 | 613/614/615 | $\text{Mg}-(\text{Kaem}-\text{H})_2+\text{H}^++\text{H}_2\text{O}$                      | 379/380/381 | 379/380/381 | $\text{Mg}-(\text{Kaem}-2\text{H})+\text{K}^++\text{CH}_3\text{OH}$     |
| 617         | 617/618/619 | $\text{Mg}-(\text{Kaem}-\text{H})_2+\text{Na}^+$                                        | 147/148     | 147/148/148 | $[\text{Mg}-(\text{Api}-\text{H})]^++\text{H}^+$                        |
| 627         | 627/628/629 | $\text{Mg}-(\text{Kaem}-\text{H})_2+\text{CH}_3\text{OH}+\text{H}^+$                    | 198         | 198/199/199 | $[\text{Mg}-(\text{Api}-\text{H})]^++\text{K}^++2\text{CH}_3\text{OH}$  |
| 665/667     | 665/666/667 | $\text{Mg}-(\text{Kaem}-\text{H})_2+\text{CH}_3\text{OH}+\text{K}^+$                    | 217         | 217/217/218 | $2[\text{Mg}-(\text{Api}-\text{H})]^++\text{H}^++2\text{CH}_3\text{OH}$ |
| 667         | 665/666/667 | $\text{Ca}-(\text{Kaem}-\text{H})_2+\text{CH}_3\text{OH}+\text{Na}^+$                   | 339/340/341 | 339/340/341 | $[\text{Mg}-(\text{Api}-\text{H})]^++\text{C}_2\text{H}_5\text{OH}$     |
| 649         | 649/650/651 | $\text{Ca}-(\text{Kaem}-\text{H})_2+\text{K}^+$                                         | 325/326/327 | 325/326/327 | $[\text{Mg}-(\text{Api}-\text{H})]^++\text{CH}_3\text{OH}$              |
| 633         | 633/634/635 | $\text{Ca}-(\text{Kaem}-\text{H})_2+\text{Na}^+$                                        |             |             |                                                                         |
| 657/658/659 | 657/658/659 | $\text{Ca}-(\text{Kaem}-\text{H})_2+\text{H}^++\text{C}_2\text{H}_5\text{OH}$           |             |             |                                                                         |
| 652/653     | 651/652/653 | $\text{Ca}-(\text{Kaem}-\text{H})_2+\text{Na}^++\text{H}_2\text{O}$                     |             |             |                                                                         |
| 659/657     | 659/660/657 | $\text{Sr}-(\text{Kaem}-\text{H})_2+\text{H}^+$                                         |             |             |                                                                         |
| 681         | 681/682/679 | $\text{Sr}-(\text{Kaem}-\text{H})_2+\text{Na}^+$                                        |             |             |                                                                         |
| 709/710/708 | 709/710/708 | $\text{Ba}-(\text{Kaem}-\text{H})_2+\text{H}^+$                                         |             |             |                                                                         |
| 745         | 745/746/744 | $\text{Ba}-(\text{Kaem}-\text{H})_2+2\text{H}_2\text{O}+\text{H}^+$                     |             |             |                                                                         |
| 759/760/758 | 759/760/758 | $\text{Ba}-(\text{Kaem}-\text{H})_2+\text{H}_2\text{O}+\text{CH}_3\text{OH}+\text{H}^+$ |             |             |                                                                         |
| 763/764/762 | 763/764/762 | $\text{Ba}-(\text{Kaem}-\text{H})_2+\text{CH}_3\text{OH}+\text{Na}^+$                   |             |             |                                                                         |

**Table S3.** Fractions ( $F$ , %) of Kaem and AEM(II)-kaempferol complexes in ethanol and in ethanol:chloroform (7/3) at indicated varying ratios.

| ratio        | F(%) in ethanol                                             |                                       |                                       |                                       |
|--------------|-------------------------------------------------------------|---------------------------------------|---------------------------------------|---------------------------------------|
|              | $F(\%)$ in ethanol:chloroform (7/3)                         |                                       |                                       |                                       |
|              | $\text{Kaem}/\text{Mg}-\text{Kaem}_2/\text{Mg}-\text{Kaem}$ | $\text{Kaem}/\text{Ca}-\text{Kaem}_2$ | $\text{Kaem}/\text{Sr}-\text{Kaem}_2$ | $\text{Kaem}/\text{Ba}-\text{Kaem}_2$ |
| <b>1:0.2</b> | 0.64/0.34/0.02<br>(0.70/0.28/0.02)                          | 0.66/0.34<br>(0.65/0.35)              | 0.62/0.38<br>(0.65/0.35)              | 0.63/0.37<br>(0.66/0.34)              |
| <b>1:0.5</b> | 0.28/0.62/0.1<br>(0.42//0.51/0.07)                          | 0.37/0.63<br>(0.34/0.66)              | 0.23/0.77<br>(0.34/0.66)              | 0.29/0.71<br>(0.36/0.64)              |
| <b>1:1</b>   | 0.12/0.64/0.24<br>(0.26/0.60/0.14)                          | 0.23/0.77<br>(0.20/0.80)              | 0.12/0.88<br>(0.20/0.80)              | 0.16/0.84<br>(0.21/0.79)              |
| <b>1:2</b>   | 0.07/0.55/0.38<br>(0.16/0.62/0.22)                          | 0.15/0.85<br>(0.13/0.87)              | 0.07/0.93<br>(0.13/0.87)              | 0.10/0.90<br>(0.14/0.86)              |
| <b>1:5</b>   | 0.03/0.39/0.58<br>(0.09/0.55/0.36)                          | 0.09/0.91<br>(0.08/0.92)              | 0.04/0.96<br>(0.08/0.92)              | 0.06/0.94<br>(0.08/0.92)              |
| <b>1:10</b>  | 0.02/0.27/0.71<br>(0.05/0.46/0.49)                          | 0.06/0.94<br>(0.06/0.94)              | 0.03/0.97<br>(0.05/0.95)              | 0.04/0.96<br>(0.06/0.94)              |
| <b>1:20</b>  | 0.01/0.17/0.82<br>(0.03/0.35/0.62)                          | 0.04/0.96<br>(0.04/0.96)              | 0.02/0.98<br>(0.04/0.96)              | 0.03/0.97<br>(0.04/0.96)              |
